# Supplementary material for: Evaluation of Disinfectant Efficacy against Biofilm-Residing Wild-Type Salmonella from the Porcine Industry
Source: MDPI journal article supplement (doi:10.3390/antibiotics12071189), 2023-07-14
Supplement: s1 [file s1]

## Supplementary Materials

**Table S1.** Biofilm production in the microtiter plate assay and colony morphotype by wild-type *S. Derby* isolates from the pig industry

| Isolate   | Production stage | Year isolated | OD <sub>600</sub> in MTP <sup>a</sup> | Morphotype <sup>b</sup> |
|-----------|------------------|---------------|---------------------------------------|-------------------------|
| L00665-06 | Finisher         | 2006          | 0.037                                 | saw                     |
| L00840-07 | Finisher         | 2007          | 0.041                                 | saw                     |
| L01888-06 | Finisher         | 2006          | 0.043                                 | saw                     |
| S05998-15 | Sow/gilt         | 2015          | 0.048                                 | saw                     |
| S01708-07 | Finisher         | 2007          | 0.049                                 | saw                     |
| L00074-07 | Finisher         | 2007          | 0.050                                 | saw                     |
| S04186-13 | Finisher         | 2013          | 0.052                                 | rdar                    |
| S01160-06 | Finisher         | 2006          | 0.053                                 | saw                     |
| S04854-11 | Sow/gilt         | 2011          | 0.056                                 | saw                     |
| L00834-07 | Finisher         | 2007          | 0.069                                 | saw                     |
| L01030-08 | Finisher         | 2008          | 0.073                                 | saw                     |
| S01523-07 | Finisher         | 2007          | 0.077                                 | saw                     |
| L01583-06 | Finisher         | 2006          | 0.274                                 | rdar                    |

|                              |          |      |       |      |
|------------------------------|----------|------|-------|------|
| <b>L00870-08</b>             | Finisher | 2008 | 0.800 | rdar |
| <b>S01829-11<sup>c</sup></b> | Finisher | 2011 | 0.971 | rdar |

<sup>a</sup> Optical density (OD) in microtiter plates. <sup>b</sup> saw = smooth and white colonies. rdar = red, dry and rough colonies. <sup>c</sup> Included in disinfection studies

**Table S2.** Biofilm production in the microtiter plate assay and colony morphotype of wild-type *S. Typhimurium* (including monophasic variants) isolates from the pig industry

| Isolate                      | Serovar | Phage Type | Production stage | Year isolated | OD <sub>600</sub> in MTP <sup>a</sup> | Colony morphology <sup>b</sup> |
|------------------------------|---------|------------|------------------|---------------|---------------------------------------|--------------------------------|
| <b>S00391-19</b>             | ST      | DT193      | Sow/gilt         | 2018          | 0.038                                 | bdar                           |
| <b>S02329-19</b>             | mST     | DT193      | Finisher         | 2018          | 0.167                                 | rdar                           |
| <b>L01764-06<sup>c</sup></b> | ST      | U302       | Finisher         | 2006          | 0.182                                 | bdar                           |
| <b>S01706-07</b>             | ST      | U288       | Finisher         | 2007          | 0.280                                 | rdar                           |
| <b>L00482-08</b>             | ST      | DT193      | Finisher         | 2008          | 0.466                                 | rdar                           |
| <b>L00762-07</b>             | ST      | U288       | Finisher         | 2007          | 0.546                                 | bdar                           |
| <b>S00076-11</b>             | mST     | DT193      | Sow/gilt         | 2010          | 0.574                                 | saw                            |
| <b>S01125-09</b>             | mST     | DT193      | Finisher         | 2009          | 0.612                                 | rdar                           |
| <b>S05813-15</b>             | mST     | DT193      | Sow/gilt         | 2015          | 0.669                                 | saw                            |
| <b>S01872-07</b>             | ST      | U288       | Finisher         | 2007          | 0.677                                 | bdar                           |
| <b>S02075-07</b>             | ST      | U288       | Finisher         | 2007          | 0.731                                 | bdar                           |
| <b>L00836-07</b>             | ST      | U288       | Finisher         | 2007          | 0.740                                 | rdar                           |
| <b>S02190-12</b>             | ST      | DT193      | Finisher         | 2012          | 0.866                                 | bdar                           |
| <b>L01105-18</b>             | mST     | DT193      | Sow/gilt         | 2018          | 0.894                                 | rdar                           |
| <b>S01671-11</b>             | ST      | U288       | Finisher         | 2011          | 0.911                                 | rdar                           |
| <b>S00534-18<sup>c</sup></b> | mST     | DT193      | Sow/gilt         | 2017          | 0.918                                 | rdar                           |
| <b>L00381-07</b>             | ST      | U288       | Sow/gilt         | 2007          | 0.933                                 | rdar                           |
| <b>S05778-18</b>             | mST     | DT193      | Finisher         | 2018          | 0.952                                 | rdar                           |
| <b>S00522-08</b>             | ST      | DT193      | Finisher         | 2008          | 0.956                                 | rdar                           |

|                              |     |       |          |      |       |      |
|------------------------------|-----|-------|----------|------|-------|------|
| <b>S00750-19<sup>c</sup></b> | mST | DT193 | Finisher | 2019 | 0.968 | rdar |
| <b>S04907-12</b>             | mST | DT193 | Finisher | 2012 | 0.989 | rdar |
| <b>L01033-08</b>             | ST  | DT193 | Finisher | 2008 | 0.990 | rdar |
| <b>L00064-16</b>             | mST | DT193 | Finisher | 2016 | 1.017 | rdar |
| <b>S03694-19</b>             | mST | DT193 | Sow/gilt | 2018 | 1.025 | rdar |
| <b>S01524-07</b>             | ST  | U288  | Finisher | 2007 | 1.026 | rdar |
| <b>L00872-08</b>             | ST  | DT193 | Sow/gilt | 2008 | 1.031 | rdar |
| <b>L00833-07</b>             | ST  | U302  | Finisher | 2007 | 1.047 | rdar |
| <b>S00085-07</b>             | ST  | U302  | Finisher | 2006 | 1.065 | rdar |
| <b>S05947-07</b>             | ST  | U288  | Sow/gilt | 2007 | 1.094 | rdar |
| <b>S00479-12</b>             | mST | DT193 | Finisher | 2012 | 1.096 | rdar |
| <b>L01107-08<sup>c</sup></b> | ST  | DT193 | Finisher | 2008 | 1.097 | rdar |
| <b>S04541-12</b>             | ST  | U288  | Finisher | 2012 | 1.104 | rdar |
| <b>S05574-08</b>             | mST | DT193 | Finisher | 2008 | 1.142 | rdar |
| <b>L01196-08</b>             | ST  | DT193 | Finisher | 2008 | 1.204 | rdar |
| <b>S04187-13<sup>c</sup></b> | ST  | U288  | Finisher | 2013 | 1.213 | rdar |

<sup>a</sup> Optical density (OD) in microtiter plates. <sup>b</sup> saw = smooth and white colonies. bdar = brown, dry and rough colonies. rdar = red, dry and rough colonies.

<sup>c</sup> Included in disinfection studies

**Table S3** The mean achievable log<sub>10</sub> CFU for each strain in each assay and for both disinfectants with standard deviation (SD)

|                       |            | L01107-08             |      | S04187-13             |      | S01829-11             |      | S00750-19             |      | S00534-18             |      | L01764-06             |      |
|-----------------------|------------|-----------------------|------|-----------------------|------|-----------------------|------|-----------------------|------|-----------------------|------|-----------------------|------|
|                       |            | log <sub>10</sub> CFU | ± SD |
| <b>Peracetic acid</b> |            |                       |      |                       |      |                       |      |                       |      |                       |      |                       |      |
| SSCA                  | Control 0% | 7.09                  | 0.45 | 6.54                  | 0.12 | 6.93                  | 0.35 | 6.39                  | 0.16 | 7.49                  | 0.18 | 6.13                  | 0.04 |
|                       | 0.01 %     | 4.72                  | 0.89 | 5.53                  | 1.28 | 5.61                  | 1.11 | 4.78                  | 0.52 | 7.04                  | 0.33 | 4.61                  | 0.81 |
|                       | 0.03 %     | 3.10                  | 0.10 | 3.00                  | 0.00 | 3.71                  | 0.43 | 3.55                  | 0.55 | 3.73                  | 0.42 | 3.10                  | 0.10 |
|                       | 0.04 %     | 3.00                  | 0.00 | 3.00                  | 0.00 | 3.72                  | 0.72 | 3.00                  | 0.00 | 3.10                  | 0.10 | 3.00                  | 0.00 |
|                       | 0.05 %     | 1.70                  | 0.00 | 1.70                  | 0.00 | 2.45                  | 0.75 | 1.70                  | 0.00 | 2.02                  | 0.32 | 1.70                  | 0.00 |
|                       | 0.10 %     | 1.70                  | 0.00 | 1.70                  | 0.00 | 1.70                  | 0.00 | 1.70                  | 0.00 | 1.70                  | 0.00 | 1.70                  | 0.00 |
|                       | 0.50 %     | 1.70                  | 0.00 | 1.70                  | 0.00 | 1.70                  | 0.00 | 1.70                  | 0.00 | 1.70                  | 0.00 | 1.70                  | 0.00 |
| PCA                   | Control 0% | 7.45                  | 0.23 | 6.57                  | 0.68 | 6.22                  | 0.77 | 6.88                  | 0.26 | 7.50                  | 0.54 | 5.50                  | 0.33 |
|                       | 0.0005%    | 6.50                  | 0.91 | 4.27                  | 2.50 | 4.08                  | 0.78 | 5.82                  | 2.23 | 6.48                  | 0.46 | a                     | a    |
|                       | 0.0007%    | 6.95                  | 0.49 | 5.08                  | 1.04 | 3.82                  | 1.85 | 4.55                  | 2.39 | 6.18                  | 1.06 | a                     | a    |
|                       | 0.001%     | 5.02                  | 3.28 | 3.95                  | 2.15 | 2.72                  | 1.24 | 6.28                  | 0.83 | 5.83                  | 1.43 | a                     | a    |
|                       | 0.002%     | 5.28                  | 0.67 | 2.00                  | 0.00 | 2.00                  | 0.00 | 5.03                  | 0.85 | 4.12                  | 1.08 | a                     | a    |
|                       | 0.005%     | 2.20                  | 1.31 | 2.00                  | 0.00 | 2.00                  | 0.00 | 2.32                  | 0.35 | 2.15                  | 0.26 | a                     | a    |
|                       | 0.03%      | 2.00                  | 0.00 | 2.00                  | 0.00 | 2.00                  | 0.00 | 2.00                  | 0.00 | 2.00                  | 0.00 | a                     | a    |
| GBA                   | Control 0% | 7.65                  | 0.13 | 7.45                  | 0.18 | 7.60                  | 0.13 | 7.70                  | 0.30 | 7.67                  | 0.13 | 7.53                  | 0.03 |
|                       | 0.01 %     | 7.25                  | 0.26 | 6.40                  | 0.05 | 6.87                  | 0.16 | 7.30                  | 0.10 | 7.12                  | 0.28 | 7.15                  | 0.09 |
|                       | 0.03 %     | 6.32                  | 0.16 | 5.38                  | 0.39 | 6.02                  | 0.33 | 6.32                  | 0.08 | 6.13                  | 0.20 | 5.80                  | 0.13 |
|                       | 0.04 %     | 4.52                  | 1.19 | 2.53                  | 1.53 | 4.33                  | 0.85 | 5.78                  | 0.60 | 5.78                  | 0.81 | 5.68                  | 0.38 |
|                       | 0.05 %     | 4.00                  | 0.97 | 3.03                  | 1.24 | 3.47                  | 1.45 | 3.87                  | 1.71 | 2.75                  | 2.65 | 3.12                  | 0.48 |
|                       | 0.10 %     | 1.00                  | 0.00 | 1.60                  | 0.52 | 1.45                  | 0.78 | 1.00                  | 0.00 | 1.00                  | 0.00 | 1.00                  | 0.00 |
|                       | 0.50 %     | 1.00                  | 0.00 | 1.00                  | 0.00 | 1.00                  | 0.00 | 1.30                  | 0.52 | 1.00                  | 0.00 | 1.00                  | 0.00 |
| <b>Glutaraldehyde</b> |            |                       |      |                       |      |                       |      |                       |      |                       |      |                       |      |
| SSCA                  | Control 0% | 7.21                  | 0.27 | 6.92                  | 0.05 | 7.07                  | 0.05 | 7.36                  | 0.17 | 7.27                  | 0.22 | 5.98                  | 0.02 |

|     |            |      |      |      |      |      |      |      |      |      |      |      |      |
|-----|------------|------|------|------|------|------|------|------|------|------|------|------|------|
|     | 0.01 %     | 6.86 | 0.21 | 6.30 | 0.25 | 6.97 | 0.11 | 7.10 | 0.05 | 7.06 | 0.23 | 4.98 | 0.48 |
|     | 0.05 %     | 6.37 | 0.16 | 5.85 | 0.44 | 5.76 | 0.39 | 6.31 | 0.23 | 6.05 | 0.50 | 4.09 | 0.02 |
|     | 0.10 %     | 4.55 | 0.68 | 4.60 | 1.45 | 6.07 | 0.40 | 5.91 | 0.07 | 3.86 | 1.23 | 2.13 | 0.43 |
|     | 0.50 %     | 1.70 | 0.00 | 2.26 | 0.56 | 1.70 | 0.00 | 1.70 | 0.00 | 1.70 | 0.00 | 1.70 | 0.00 |
|     | 1.00 %     | 1.70 | 0.00 | 1.70 | 0.00 | 1.70 | 0.00 | 1.70 | 0.00 | 1.70 | 0.00 | 1.70 | 0.00 |
| PCA | Control 0% | 6.65 | 0.44 | 5.80 | 0.19 | 5.85 | 0.63 | 6.46 | 0.74 | 6.15 | 0.21 | 4.86 | 0.34 |
|     | 0.01 %     | 6.86 | 0.26 | 5.88 | 0.31 | 5.80 | 0.74 | 6.23 | 0.53 | 5.88 | 0.36 | a    | a    |
|     | 0.05 %     | 5.19 | 0.56 | 3.46 | 0.76 | 2.40 | 0.10 | 4.50 | 1.96 | 4.05 | 0.62 | a    | a    |
|     | 0.10 %     | 4.01 | 0.64 | 2.48 | 0.41 | 2.00 | 0.00 | 2.39 | 0.48 | 2.00 | 0.00 | a    | a    |
|     | 0.50 %     | 2.00 | 0.00 | 2.00 | 0.00 | 2.00 | 0.00 | 2.00 | 0.00 | 2.00 | 0.00 | a    | a    |
|     | 1.00 %     | b    | b    | b    | b    | b    | b    | b    | b    | b    | b    | b    | b    |
| GBA | Control 0% | 7.65 | 0.13 | 7.47 | 0.13 | 7.40 | 0.28 | 7.55 | 0.13 | 7.52 | 0.13 | 7.48 | 0.03 |
|     | 0.01 %     | 7.50 | 0.48 | 7.35 | 0.09 | 7.08 | 0.13 | 7.17 | 0.45 | 7.15 | 0.17 | 7.23 | 0.13 |
|     | 0.05 %     | 6.92 | 0.40 | 6.33 | 0.19 | 5.80 | 0.26 | 6.47 | 0.14 | 6.33 | 0.21 | 6.42 | 0.08 |
|     | 0.10 %     | 5.63 | 1.13 | 5.82 | 0.74 | 3.23 | 1.94 | 6.05 | 0.35 | 4.62 | 1.21 | 5.33 | 0.49 |
|     | 0.50 %     | 5.02 | 0.93 | 2.68 | 1.48 | 2.17 | 1.16 | 3.43 | 1.78 | 4.55 | 1.20 | 1.95 | 1.03 |
|     | 1.00 %     | 3.27 | 2.63 | 4.17 | 0.53 | 1.97 | 0.85 | 1.57 | 0.98 | 4.95 | 1.40 | 1.88 | 0.80 |

SD = Standard deviation CFU = colony forming units SSCA = Stainless steel coupon assay PCA = Plastic coupon assay GBA = Glass bead assay

a = strain not tested b=concentration not included
